# Supplementary material
Source: Springer Nature journal article supplement (https://www.springermedizin.de/resource/supplementary/13075_2005_1769_MOESM10_ESM.pdf/9690538)
Supplement: MOESM10 [file 9690538]

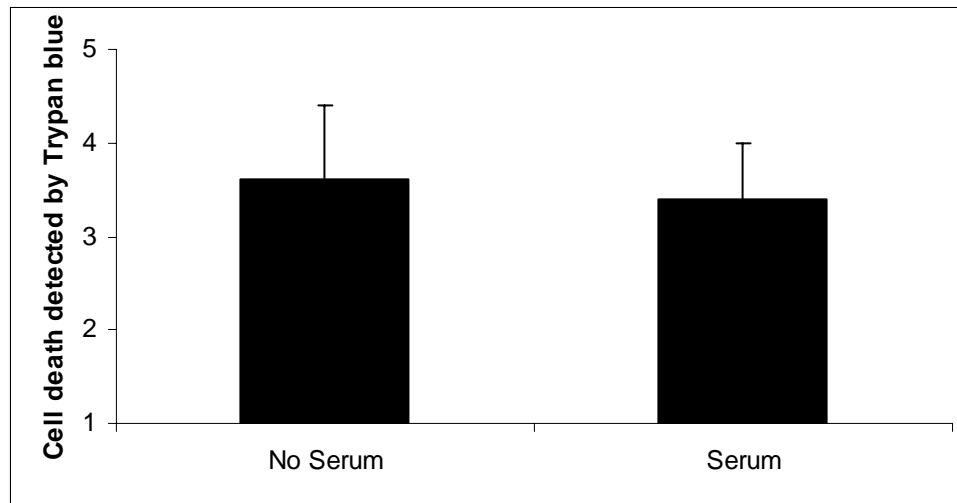

Supplement Figure 3. Serum-starvation will not effect cell death in 24 h incubation period. Cell death was detected by trypan blue incorporation.
